# Supplementary material for: Functional and Surgical Outcomes of Second Toe-to-Thumb Microvascular Reconstruction: A Case Series from a Tertiary Care Hospital in Karachi, Pakistan
Source: Research Square preprint supplement (doi:10.21203/rs.3.rs-7768763/v1), 2025-11-24
Supplement: Supplementary file 1 [file 9b3c0b586b6a411c8e08aeda.docx]

# Proforma for Case Series: Second Toe-to-Thumb Transfer

## Patient Information

| Patient ID / Case No. |  |
| --- | --- |
| Sex | ☐ Male  ☐ Female |
| Age (years) |  |
| Date of Surgery |  |

## Injury Details

| Mechanism of Injury | ☐ Road Traffic Accident ☐ Blast Injury ☐ Machine Crush ☐ Machine Cut ☐ Other: ________ |
| --- | --- |
| Hand Involved | ☐ Right ☐ Left |
| Level of Amputation / Defect | ☐ CMC ☐ MCP ☐ IP ☐ Other: ________ |
| Dominant Hand | ☐ Right ☐ Left |

## Donor Site Details

| Donor Toe | ☐ Second ☐ Great ☐ Other: ________ |
| --- | --- |
| Dominant Artery Used | ☐ Dorsal ☐ Plantar |
| Donor Site Closure | ☐ Primary ☐ Skin Graft ☐ Flap ☐ Other: ________ |

## Postoperative Outcomes

| Complications | ☐ None ☐ Partial Necrosis ☐ Venous Congestion ☐ Infection ☐ Other: ________ |
| --- | --- |
| Functional Outcome | QuickDASH: ______ MHQ: ______ 2 PD: ______ |
| Follow-up Duration | ☐ 3 months ☐ 6 months ☐ 1 year ☐ Other: ______ |

## Surgeon / Data Recorder

| Name | Signature / Date |
| --- | --- |
